# Supplementary material
Source: ML conference proceedings conference paper supplement (https://openreview.net/forum?id=I3zV6igAT9)
Supplement: supplementary_material [file attachment]

---

## APPENDIX

### A PROOFS

#### A.1 PROOF OF THEOREM 1

**Theorem 1** *For any Model  $M : \mathcal{X} \rightarrow (\mathcal{Y} \rightarrow [0, 1])$  and given canonical calibration mapping  $R(p) = \mathbb{P}[(M(X))(Y) \leq p]$ ,  $R \circ M$  is quantile calibrated*

**Proof:** To show that  $R \circ M$  is quantile calibrated, we need to show that  $\mathbb{P}[(R \circ M)[X][Y] \leq p] = p$ ,  $\forall p \in [0, 1]$  since we are assuming that  $R(p)$  is invertible function, which gives us that it is surjective. An equivalent way of showing this is that  $\mathbb{P}[(R \circ M)[X][Y] \leq R(p)] = R(p) \quad \forall p \in [0, 1]$

$$\begin{aligned} \mathbb{P}[(R \circ M)[X][Y] \leq R(p)] &= \mathbb{P}\left[R^{-1}((R \circ M)[X][Y]) \leq R^{-1}(R(p))\right] \quad R^{-1} \text{ is strictly increasing} \\ &= \mathbb{P}[(M[X])(Y) \leq p] \\ &= R(p) \quad \text{By definition} \end{aligned}$$

□

#### A.2 PROOF OF CLAIM 1,2,3

**Claim 1** *Let  $Y$  be a random variable with CDF  $F$ , and let  $G = R \circ F$  be its CDF after composing with mapping  $R$  obtained from isotonic regression characterized by  $\mathcal{C} = \{c_{(1)}, c_{(2)}, \dots, c_{(n)}\}$ . If there exist  $i - 1, i, i + 1 \in \{0, n\} \wedge c_{(i)} - c_{(i-1)} \neq c_{(i+1)} - c_{(i)}$  then the CDF  $G$  is not differentiable and its corresponding probability density function  $g$  is not continuous at  $F^{-1}(c_{(i)})$*

**Proof:** First,  $G$  can be expressed as follows

$$G(x) = \begin{cases} \frac{F(x)}{nc_{(1)}} & -\infty < x \leq F^{-1}(c_{(1)}) \\ \frac{F(x) - c_{(1)}}{n(c_{(2)} - c_{(1)})} + \frac{1}{n} & F^{-1}(c_{(1)}) < x \leq F^{-1}(c_{(2)}) \\ \frac{F(x) - c_{(2)}}{n(c_{(3)} - c_{(2)})} + \frac{2}{n} & F^{-1}(c_{(2)}) < x \leq F^{-1}(c_{(3)}) \\ \vdots & \vdots \\ \frac{F(x) - c_{(n-1)}}{c_{(n)} - c_{(n-1)}} + \frac{n-1}{n} & F^{-1}(c_{(n-1)}) < x \leq F^{-1}(c_{(n)}) \end{cases}$$

Let  $a = F^{-1}(c_{(1)})$ . We will show that  $G$  not differentiable at  $a$ . Similarly we can show that it is not differentiable at the other  $n - 2$  switching points.

The left derivative is as follows

$$\lim_{x \rightarrow a^-} \frac{G(x) - G(a)}{x - a} = \lim_{x \rightarrow a^-} \frac{\frac{F(x)}{nc_{(1)}} - \frac{F(a)}{nc_{(1)}}}{x - a} = \frac{1}{nc_{(1)}} \lim_{x \rightarrow a^-} \frac{F(x) - F(a)}{x - a} = \frac{F'(a)}{nc_{(1)}}$$

The right derivative is as follows

$$\begin{aligned} \lim_{x \rightarrow a^+} \frac{G(x) - G(a)}{x - a} &= \lim_{x \rightarrow a^+} \frac{\frac{F(x) - c_{(1)}}{n(c_{(2)} - c_{(1)})} + \frac{1}{n} - \frac{1}{n}}{x - a} \\ &= \frac{1}{n \cdot (c_{(2)} - c_{(1)})} \lim_{x \rightarrow a^+} \frac{F(x) - F(a)}{x - a} = \frac{F'(a)}{n \cdot (c_{(2)} - c_{(1)})} \end{aligned} \quad (1)$$

Hence  $G$  is not differentiable.

Although the CDF is not differentiable at only a finite number of points, we can still get the PDF by piece-wise differentiation.

$$g(x) = \begin{cases} \frac{f(x)}{nc_{(1)}} & -\infty < x \leq F^{-1}(c_{(1)}) \\ \frac{f(x)}{n(c_{(2)} - c_{(1)})} & F^{-1}(c_{(1)}) < x \leq F^{-1}(c_{(2)}) \\ \frac{f(x)}{n(c_{(3)} - c_{(2)})} & F^{-1}(c_{(2)}) < x \leq F^{-1}(c_{(3)}) \\ \vdots & \vdots \\ \frac{f(x)}{n \cdot (c_{(n)} - c_{(n-1)})} & F^{-1}(c_{(n-1)}) < x \leq F^{-1}(c_{(n)}) \end{cases} \quad (2)$$

Now consider for any  $i - 1, i, i + 1 \in \{0, n\}$  s.t  $c_i - c_{i-1} \neq c_{i+1} - c_i$ . Let  $a = F^{-1}(c_i)$  then

$$\lim_{x \rightarrow a^-} g(x) = \lim_{x \rightarrow a^-} \frac{f(x)}{n(c_i - c_{(i-1)})} = \frac{f(a)}{n(c_i - c_{(i-1)})}$$

$$\lim_{x \rightarrow a^+} g(x) = \lim_{x \rightarrow a^+} \frac{f(x)}{n(c_{(i+1)} - c_i)} = \frac{f(a)}{n(c_{(i+1)} - c_i)}$$

Since the right limit and left limit do not coincide and by construction of point  $a$ , we have that limit does not exist and therefore  $g(x)$  is not continuous at  $a$

Note that, most of times, the hypothesis is satisfied, so the smoothness is lost.  $\square$

**Claim 2** Let  $Y_{iso}$  be transformed random variable after applying isotonic mapping  $R$  on random variable  $Y$ . Then the expectation of  $Y_{iso}$  is as follows

$$\mathbb{E}[Y_{iso}] = \mu - \frac{\sigma^2}{n} \sum_{i=0}^{n-1} \frac{f(F^{-1}(c_{(i+1)})) - f(F^{-1}(c_{(i)}))}{(c_{(i+1)} - c_{(i)})}$$

**Proof:** Assume that, before transformation, the random variable is distributed  $X \sim \mathcal{N}(\mu, \sigma^2)$  so

$$f(x) = \frac{1}{\sqrt{2\pi\sigma^2}} \exp \frac{-(x - \mu)^2}{2\sigma^2}$$

---


$$\begin{aligned}
\mathbb{E}[Y_{\text{iso}}] &= \int_{-\infty}^{\infty} x \cdot g(x) dx \\
&= \sum_{i=0}^{n-1} \int_{F^{-1}(c_{(i)})}^{F^{-1}(c_{(i+1)})} x \cdot \frac{f(x)}{n \cdot (c_{(i+1)} - c_{(i)})} dx \\
&= \sum_{i=0}^{n-1} \frac{1}{n(c_{(i+1)} - c_{(i)})} \int_{F^{-1}(c_{(i)})}^{F^{-1}(c_{(i+1)})} x \cdot \frac{1}{\sqrt{2\pi} \cdot \sigma^2} \exp \frac{-(x - \mu)^2}{2 \cdot \sigma^2} dx \\
&= \sum_{i=0}^{n-1} \frac{1}{n(c_{(i+1)} - c_{(i)})} \int_{F^{-1}(c_{(i)})}^{F^{-1}(c_{(i+1)})} (x - \mu + \mu) \cdot \frac{1}{\sqrt{2\pi} \cdot \sigma^2} \exp \frac{-(x - \mu)^2}{2 \cdot \sigma^2} dx && x = x - \mu + \mu \\
&= \sum_{i=0}^{n-1} \frac{1}{n(c_{(i+1)} - c_{(i)})} \int_{F^{-1}(c_{(i)})}^{F^{-1}(c_{(i+1)})} (x - \mu) \underbrace{\frac{1}{\sqrt{2\pi} \cdot \sigma^2} \exp \frac{-(x - \mu)^2}{2 \cdot \sigma^2}}_{= t \text{ and use sub}} dx \\
&\quad + \sum_{i=0}^{n-1} \frac{1}{n(c_{(i+1)} - c_{(i)})} \int_{F^{-1}(c_{(i)})}^{F^{-1}(c_{(i+1)})} \mu \frac{1}{\sqrt{2\pi} \cdot \sigma^2} \exp \frac{-(x - \mu)^2}{2 \cdot \sigma^2} dx && \text{using linearity} \\
&= \sum_{i=0}^{n-1} \frac{1}{n(c_{(i+1)} - c_{(i)})} \left[ \frac{-\sigma^2}{\sqrt{2\pi} \cdot \sigma^2} \exp \frac{-(x - \mu)^2}{2 \cdot \sigma^2} \right]_{x=F^{-1}(c_{(i)})}^{x=F^{-1}(c_{(i+1)})} \\
&\quad + \sum_{i=0}^{n-1} \frac{\mu}{n(c_{(i+1)} - c_{(i)})} F(F^{-1}(c_{(i+1)})) - F(F^{-1}(c_{(i)})) && \text{using def of cdf} \\
&= \sum_{i=0}^{n-1} \frac{-\sigma^2}{n} \frac{f(F^{-1}(c_{(i+1)})) - f(F^{-1}(c_{(i)}))}{(c_{(i+1)} - c_{(i)})} + \underbrace{\mu \sum_{i=0}^{n-1} \frac{1}{n} \frac{F(F^{-1}(c_{(i+1)})) - F(F^{-1}(c_{(i)}))}{(c_{(i+1)} - c_{(i)})}}_1 \\
&= \mu - \frac{\sigma^2}{n} \sum_{i=0}^{n-1} \frac{f(F^{-1}(c_{(i+1)})) - f(F^{-1}(c_{(i)}))}{(c_{(i+1)} - c_{(i)})}
\end{aligned}$$

□

**Lemma 1** Let  $f_{\mu,\sigma}$ ,  $F_{\mu,\sigma}$ ,  $F_{\mu,\sigma}^{-1}$  be density, distribution, and quantile functions, respectively, of the normal distribution with mean  $\mu$  and std  $\sigma$ . Then

$$f_{\mu,\sigma} \left[ F_{\mu,\sigma}^{-1} (F_{\mu_0,\sigma_0}(y_0)) \right] = \frac{\sigma_0}{\sigma} f_{\mu_0,\sigma_0}(y_0)$$

**Proof:** We use the following three properties of normally distributed random variables

1.  $F_{\mu,\sigma}(y) = F_{0,1}(\frac{y-\mu}{\sigma})$
2.  $f_{\mu,\sigma}(y) = \frac{1}{\sigma} f_{0,1}(\frac{y-\mu}{\sigma})$
3.  $F_{\mu,\sigma}^{-1}(p) = \sigma \cdot F_{0,1}^{-1}(p) + \mu$

$$\begin{aligned}
f_{\mu,\sigma} \left[ F_{\mu,\sigma}^{-1} (F_{\mu_0,\sigma_0}(y_0)) \right] &= f_{\mu,\sigma} \left[ F_{\mu,\sigma}^{-1} \left( F_{0,1} \left( \frac{y_0 - \mu_0}{\sigma_0} \right) \right) \right] && \text{by using (1)} \\
&= f_{\mu,\sigma} \left[ \sigma \cdot F_{0,1}^{-1} \left( F_{0,1} \left( \frac{y_0 - \mu_0}{\sigma_0} \right) \right) + \mu \right] && \text{by using (3)} \\
&= f_{\mu,\sigma} \left[ \sigma \cdot \frac{y_0 - \mu_0}{\sigma_0} + \mu \right] && F^{-1}F(x) = x \\
&= \frac{1}{\sigma} f_{0,1} \left[ \frac{\sigma \cdot \frac{y_0 - \mu_0}{\sigma_0} + \mu - \mu}{\sigma} \right] && \text{by using (2)} \\
&= \frac{1}{\sigma} f_{0,1} \left[ \frac{y_0 - \mu_0}{\sigma_0} \right] \\
&= \frac{\sigma_0}{\sigma} \cdot \frac{1}{\sigma_0} f_{0,1} \left[ \frac{y_0 - \mu_0}{\sigma_0} \right] && \text{Mul and Div by } \sigma_0 \\
&= \frac{\sigma_0}{\sigma} f_{\mu_0,\sigma_0}(y_0) && \text{by using (2)}
\end{aligned}$$

□

### Claim 3

$$\mathbb{E}[Y_{iso}] = \mu - \sigma \sum_{i=0}^n \underbrace{\frac{1}{n} \frac{\sigma_{(i+1)} p_{(i+1)} - \sigma_{(i)} p_{(i)}}{c_{(i+1)} - c_{(i)}}}_{\delta}$$

**Proof:** We first re-substitute  $c_{(i)} = F_{\mu_{(i)},\sigma_{(i)}}(y_{(i)})$  and  $p_{(i)} = f_{\mu_{(i)},\sigma_{(i)}}(y_{(i)})$ , then using the above claim, substituting that  $f(F^{-1}(c_{(0)})) = f(F^{-1}(0)) = \lim_{x \rightarrow -\infty} f(x) = 0$

$$\begin{aligned}
&\mu - \frac{\sigma^2}{n} \sum_{i=0}^n \frac{f(F^{-1}(c_{(i+1)})) - f(F^{-1}(c_{(i)}))}{(c_{(i+1)} - c_{(i)})} \\
&= \mu - \frac{\sigma^2}{n} \sum_{i=0}^n \frac{f(F^{-1}(F_{\mu_{(i+1)},\sigma_{(i+1)}}(y_{(i+1)}))) - f(F^{-1}(F_{\mu_{(i+1)},\sigma_{(i+1)}}(y_{(i+1)})))}{(c_{(i+1)} - c_{(i)})} \\
&= \mu - \frac{\sigma}{n} \left[ \frac{\sigma_{(1)} p_{(1)}}{c_{(1)}} + \sum_{i=1}^{n-1} \frac{\sigma_{(i+1)} p_{(i+1)} - \sigma_{(i)} p_{(i)}}{c_{(i+1)} - c_{(i)}} \right] && \text{by using } f(F^{-1}(c_{(0)})) = 0, c_{(0)} = 0 \\
&= \mu - \frac{\sigma}{n} \left[ \sum_{i=0}^{n-1} \frac{\sigma_{(i+1)} p_{(i+1)} - \sigma_{(i)} p_{(i)}}{c_{(i+1)} - c_{(i)}} \right] && \sigma_{(0)} = 0, p_{(0)} = 0, c_{(0)} = 0
\end{aligned}$$

□

### A.3 PROOFS OF CLAIM 4 AND CLAIM 5

**Claim 4** Let  $M$  be any regression model. Then  $M$  is perfectly quantile calibrated iff

$$\text{KL}([M(X)](Y) || U) = 0$$

**Proof:** Since we have that  $\text{KL}([M(X)](Y) || U)$  we have that  $M(X)(Y) \triangleq \text{Uniform}[0, 1]$  from which we have that  $\mathbb{P}([M(X)](Y) \leq p] = p \forall p$  which is the definition of quantile regularization.

□

**Claim 5** Let  $f_{\mu,\sigma}$  be the marginal distribution of  $Y$  and  $\left( F_{\mu_x,\sigma_x} = M[x] \right) \Big| X = x$  be the model's predicted cumulative distribution for  $x \in \mathcal{X}$ , then if  $f_{\mu,\sigma}[F_{\mu_x,\sigma_x}^{-1}(p)] = f_{\mu_x,\sigma_x}(F_{\mu_x,\sigma_x}^{-1}(p)) \forall x, \forall p \in [0, 1]$ , we have that  $M$  is Quantile Calibrated.

---

**Proof:**

$$\begin{aligned}
f_{M[X][Y]}(p) &= \int_{\mathcal{X}} f_{M[X][Y]|X=x}(p) \cdot f_X(x) dx \\
&= \int_{\mathcal{X}} \frac{d}{dp} \mathbf{P} \left[ \left( M[x][Y] \mid X = x \right) \leq p \right] \cdot f_X(x) dx \\
&= \int_{\mathcal{X}} \frac{d}{dp} \mathbf{P} \left[ (F_{\mu_x, \sigma_x}[Y] \leq p) \right] \cdot f_X(x) dx \\
&= \int_{\mathcal{X}} \frac{d}{dp} \mathbf{P} \left[ (Y \leq F_{\mu_x, \sigma_x}^{-1}(p)) \right] \cdot f_X(x) dx \\
&= \int_{\mathcal{X}} \frac{d}{dp} \left[ F_{\mu, \sigma}[F_{\mu_x, \sigma_x}^{-1}(p)] \right] \cdot f_X(x) dx \\
&= \int_{\mathcal{X}} f_{\mu, \sigma}[F_{\mu_x, \sigma_x}^{-1}(p)] \cdot \frac{1}{f_{\mu_x, \sigma_x}(F_{\mu_x, \sigma_x}^{-1}(p))} \cdot f_X(x) dx \\
&= \int_{\mathcal{X}} 1 \cdot f_X(x) dx \\
&= 1
\end{aligned}$$

Since we have that  $M[X][Y] \text{Uniform}[0, 1]$  we can conclude that  $M$  is Perfectly Quantile Calibrated.  $\square$

## B EXPERIMENTS

### B.1 BAYESIAN LINEAR REGRESSION

For Bayesian Linear Regression we use sklearn’s Bayesian Ridge Regression.

### B.2 UCI EXPERIMENTS

We consider following datasets (size-of-data,num-input-features): AirFoil (1503,6) , Bouston Housing (506,13), Concrete Strength (1030,8),Fish Toxicity (908,7),Kin8nm (8192, 9), Protein Structure (45730, 10), Red Wine (1599, 12), White Wine (4898, 12), Yacht Hydrodynamics (308,6), year prediction MSD (515345,91)

### B.3 CALIBRATION PLOTS FOR DROPOUT-VI

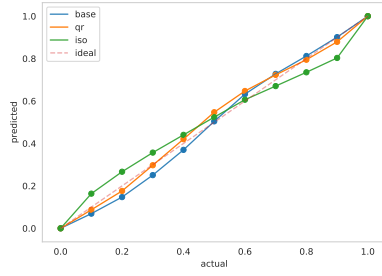

(a) Airfoil

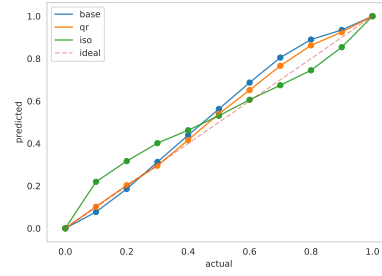

(b) Boston

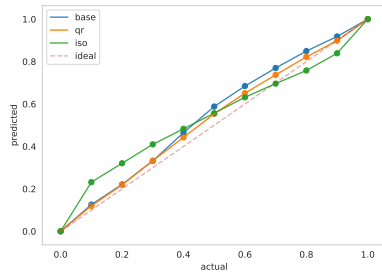

(c) Concrete

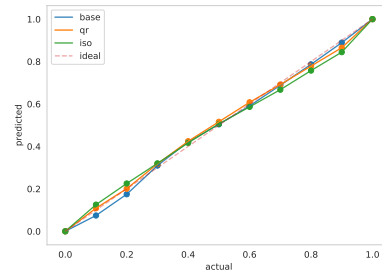

(d) White Wine

Figure 1: Dashed line ( $y=x$ ) indicates perfect Calibration. The more closer to Dashed line the better

## B.4 CALIBRATION PLOTS FOR DEEP ENSEMBLES

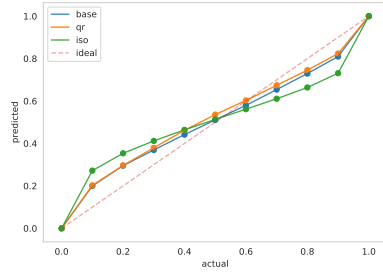

(a) Airfoil

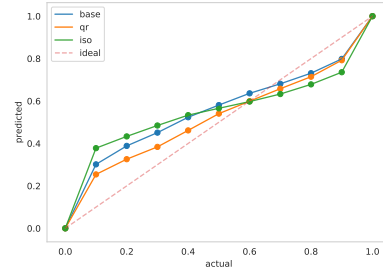

(b) Boston

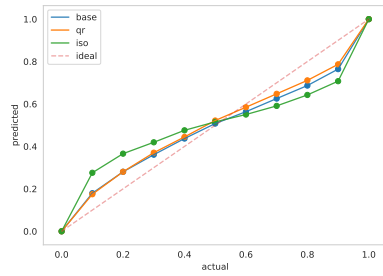

(c) Red

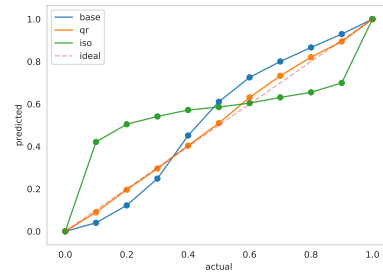

(d) Yacht Hydrodynamics

Figure 2: Dashed line ( $y=x$ ) indicates perfect Calibration. The more closer to Dashed line the better
